# Supplementary material
Source: MDPI journal article supplement (https://www.mdpi.com/2079-9292/13/9/1764)
Supplement: s1 [file s1]

## SUPPORTING INFORMATION

### Exploring the Odd-Even Effect, Current Stabilization, and Negative Differential Resistance in Carbon Chain-Based Molecular Devices

*Li-Jun Wang<sup>1</sup>, Li-Ping Zhou<sup>\*1</sup>, Xue-Feng Wang<sup>\*1</sup>, and Wen-Long You<sup>2</sup>*  
*ELECTRONICS*

<sup>1</sup> *School of Physical Science and Technology, Soochow University, 1 Shizi Street, Suzhou  
215006, People's Republic of China*

<sup>2</sup> *College of Physics, Nanjing University of Aeronautics and Astronautics, Key Laboratory of  
Aerospace Information Materials and Physics (NUAA), MIIT, Nanjing 211106, People's Republic  
of ChinaChina*

*\*zhoulp@suda.edu.cn*

*\*wxf@suda.edu.cn*

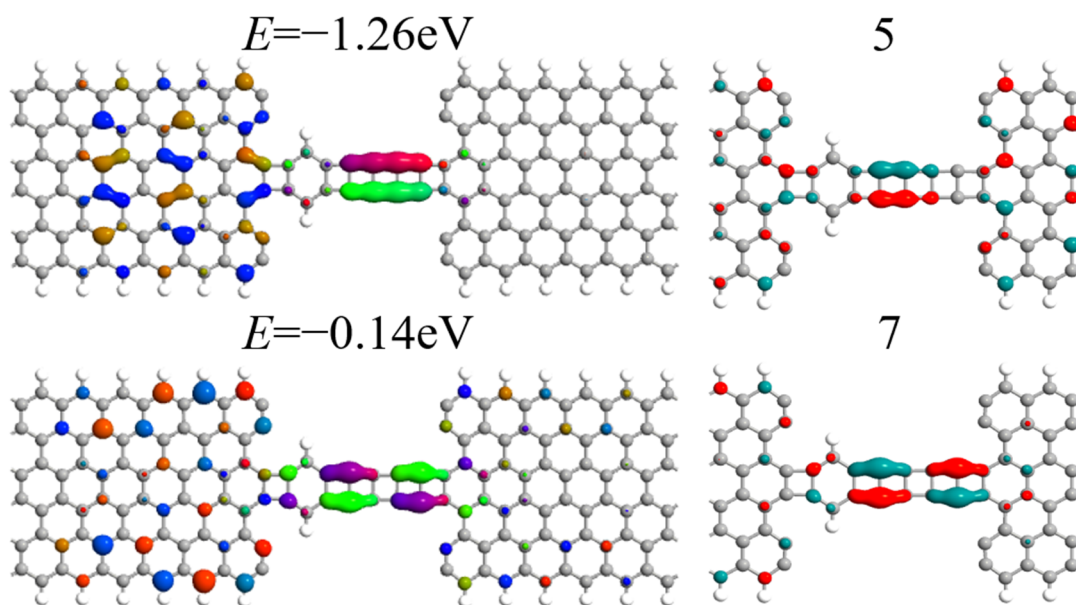

Figure S 1. For D1: The transport modes at  $E = -1.26$ ,  $-0.14$  eV and the wave functions for  $k=0$  states in bands 5 and 7 are presented correspondingly.

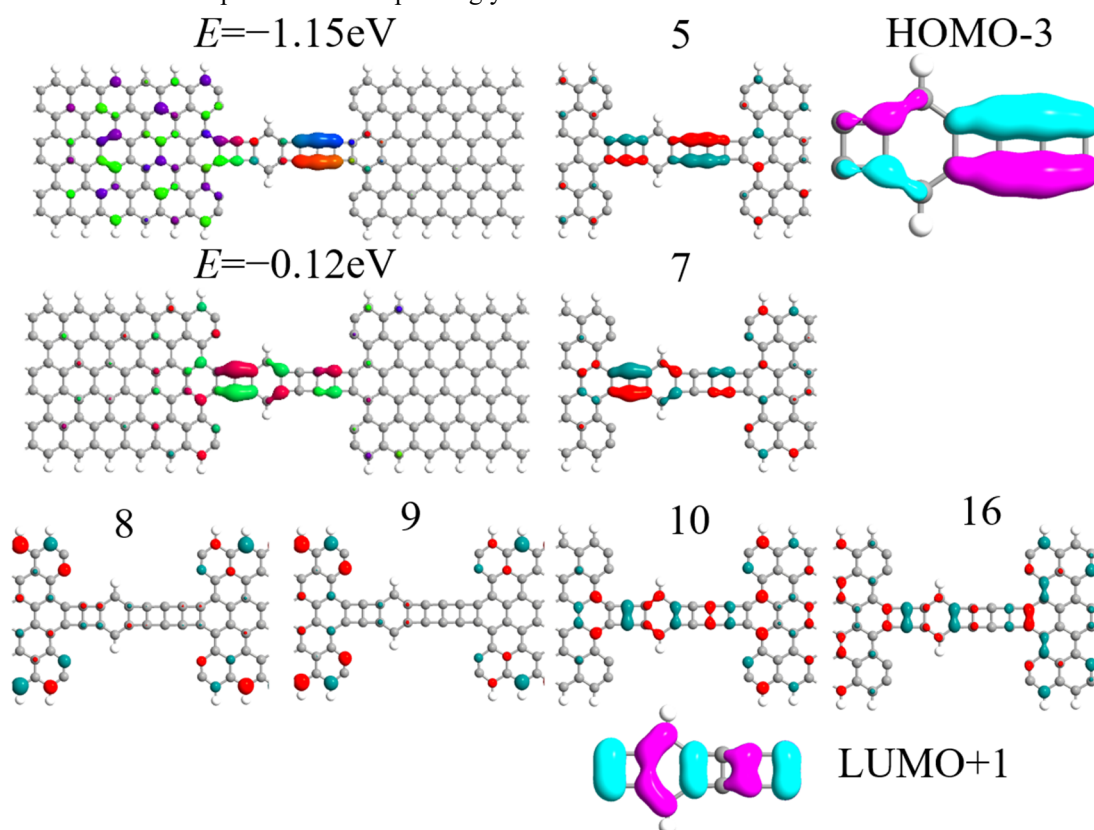

Figure S 2. For D2: The transport modes at  $E = -1.15$ ,  $-0.12$  eV; the wave functions for  $k=0$  states in bands 5, 7, 8, 9, 10 and 16; the wave functions of LUMO+1 and HOMO-3 of central molecule.

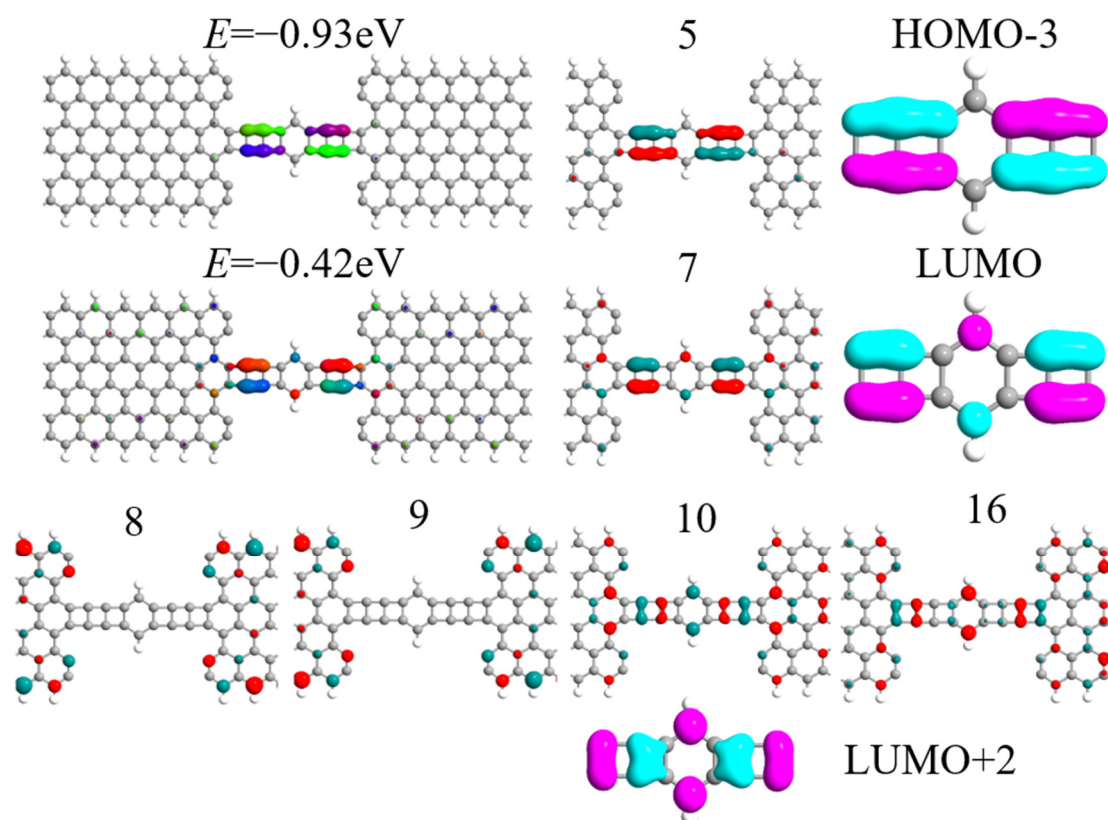

Figure S 3. For D3: The transport modes at  $E = -0.93, -0.42\text{eV}$ ; the wave functions for  $k=0$  states in bands 5, 7, 8, 9, 10 and 16; the wave functions of LUMO+2, LUMO and HOMO-3 of central molecule.

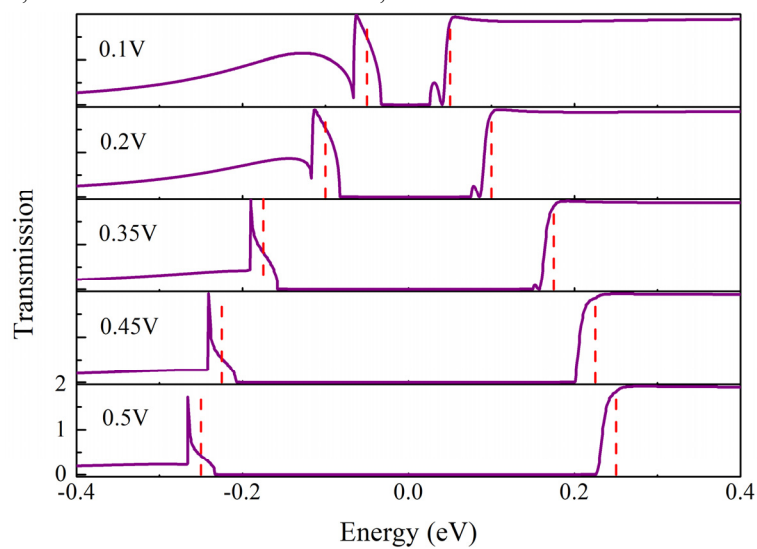

Figure S 4. Transmission spectra of D1 at different bias voltage.

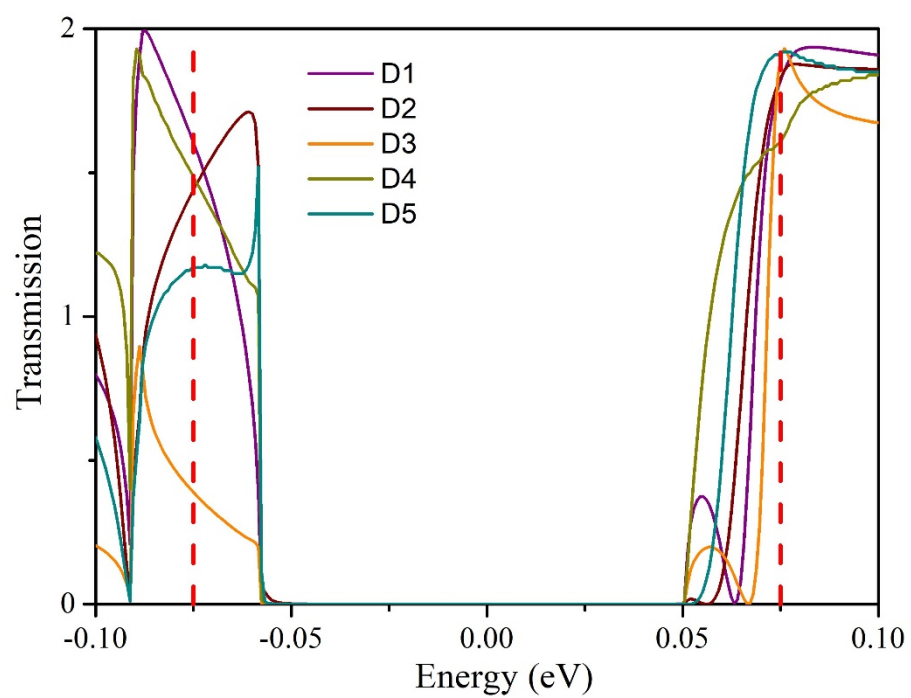

Figure S 5. 0.15V-bias-transmission spectra of D1–D5.
